# Supplementary material for: Design, synthesis and biological evaluation of esculetin derivatives as anti-tumour agents
Source: Royal Society of Chemistry journal article supplement (doi:10.1039/c5ra06070b), 2015-01-01

(Supporting Information)

**Design, synthesis and biological evaluation of esculetin derivatives  
as anti-tumour agents**

Ping Wang, Yang-Liu Xia, Guang-Bo Ge, Yang Yu, Jun-Xia Lu, Li-Wei Zou, Ling Yang\*

Laboratory of Pharmaceutical Resource Discovery, Dalian Institute of Chemical Physics, Chinese Academy of Sciences, Dalian, 116023, China. E-mail: ylingdicp@gmail.com.

**Table of Contents**

| Description                                                                                   | Page |
|-----------------------------------------------------------------------------------------------|------|
| 1. General Experimental                                                                       | S2   |
| 2. <sup>1</sup> H NMR and <sup>13</sup> C NMR spectra for compound <b>2</b>                   | S2   |
| 3. <sup>1</sup> H NMR spectra for compound <b>3</b>                                           | S3   |
| 4. <sup>1</sup> H NMR and <sup>13</sup> C NMR spectra for compound <b>4</b>                   | S4   |
| 5. <sup>1</sup> H NMR spectra for compound <b>5</b>                                           | S5   |
| 6. <sup>1</sup> H NMR spectra for compound <b>6</b>                                           | S5   |
| 7. <sup>1</sup> H NMR, <sup>13</sup> C NMR, HSQC, HMBC and HRMS spectra for compound <b>8</b> | S6   |
| 8. <sup>1</sup> H NMR, <sup>13</sup> C NMR, HSQC, HMBC and HRMS spectra for compound <b>9</b> | S8   |
| 9. <sup>1</sup> H NMR, <sup>13</sup> C NMR and HRMS spectra for compound <b>10</b>            | S10  |
| 10. <sup>1</sup> H NMR, <sup>13</sup> C NMR and HRMS spectra for compound <b>11</b>           | S11  |
| 11. <sup>1</sup> H NMR spectra for compound <b>12</b>                                         | S12  |
| 12. <sup>1</sup> H NMR, <sup>13</sup> C NMR and HRMS spectra for compound <b>13</b>           | S13  |
| 13. <sup>1</sup> H NMR, <sup>13</sup> C NMR and HRMS spectra for compound <b>14</b>           | S15  |
| 14. <sup>1</sup> H NMR, <sup>13</sup> C NMR and HRMS spectra for compound <b>15</b>           | S16  |

## 1. General Experimental

The  $^1\text{H}$  NMR and  $^{13}\text{C}$  NMR spectra were recorded in  $\text{DMSO-}d_6$  using a Bruker ARX 400 spectrometer (400 MHz for  $^1\text{H}$ NMR and 100 MHz for  $^{13}\text{C}$ NMR), and chemical shifts were expressed as ppm against TMS as an internal reference. High-resolution mass spectral (HRMS) analyses were measured with Hybrid Ion Trap-Orbitrap Mass Spectrometer (LTQ Orbitrap XL, Thermo). A UFLC system (Shimadzu, Kyoto, Japan) with tandem mass spectrometry (2010EV), using electrospray ionization (ESI) interface and a computer equipped with UFLC-MS solution software (version 3.41; Shimadzu). All reagents used in the synthesis were obtained commercially and used without further purification. The reactions were monitored by thin layer chromatography (TLC) on glass-packed precoated silica gel  $\text{GF}_{254}$  plates and visualized in an iodine chamber or with a UV lamp. Flash column chromatography was performed using silica gel (200~300 mesh) purchased from Qingdao Haiyang Chemical Co. Ltd.

## 2. $^1\text{H}$ NMR and $^{13}\text{C}$ NMR spectra for compound 2

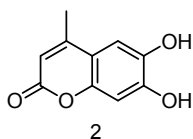

$^1\text{H}$  NMR (400 MHz,  $\text{DMSO-}d_6$ )

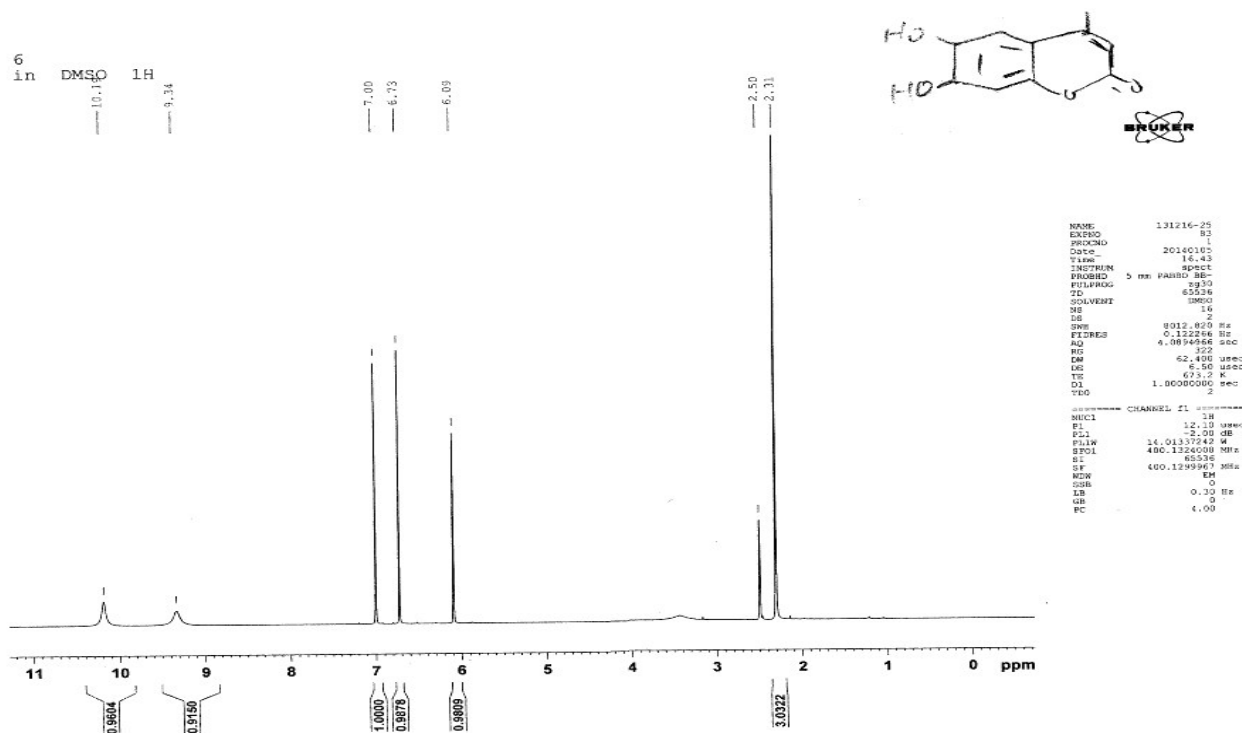

**<sup>13</sup>C NMR (100 MHz, DMSO-d<sub>6</sub>)**

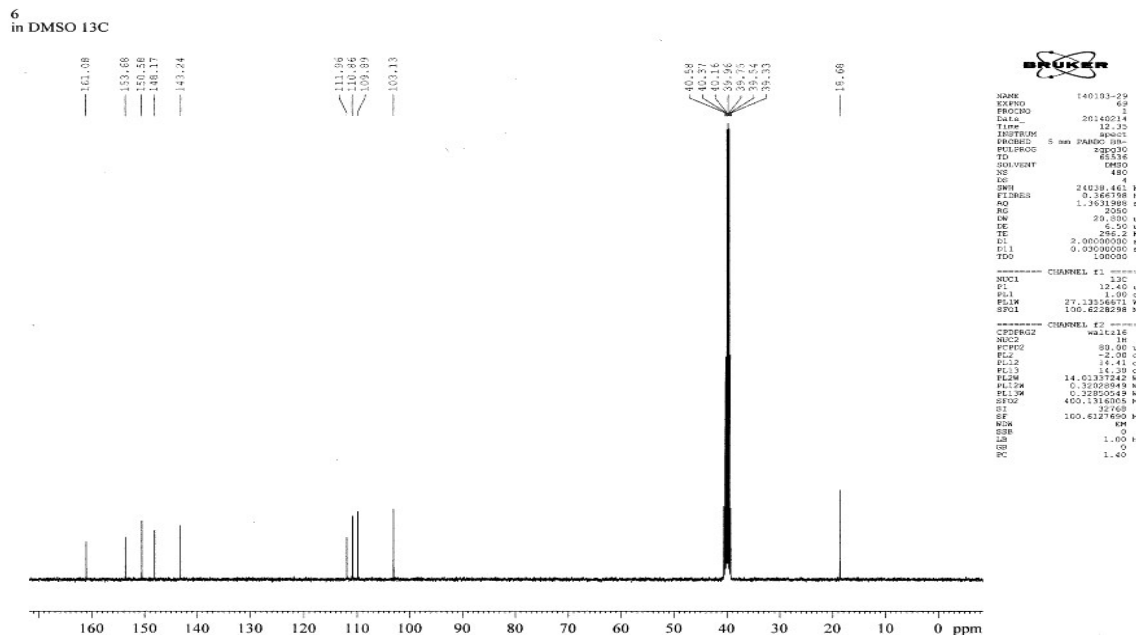

**3. <sup>1</sup>H NMR Spectra for compound 3**

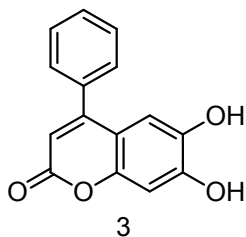

**<sup>1</sup>H NMR (400 MHz, DMSO-d<sub>6</sub>)**

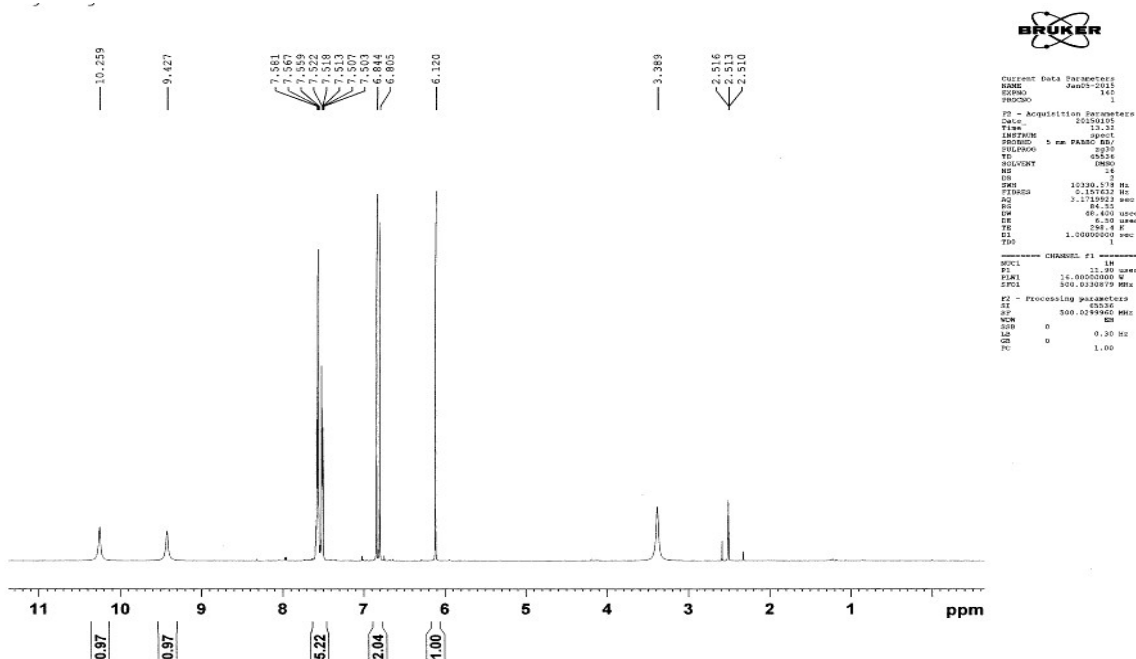

4. <sup>1</sup>H NMR and <sup>13</sup>C NMR Spectra for compound 4

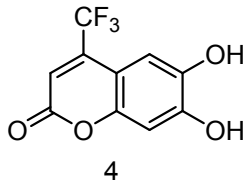

<sup>1</sup>H NMR (400 MHz, DMSO-d<sub>6</sub>)

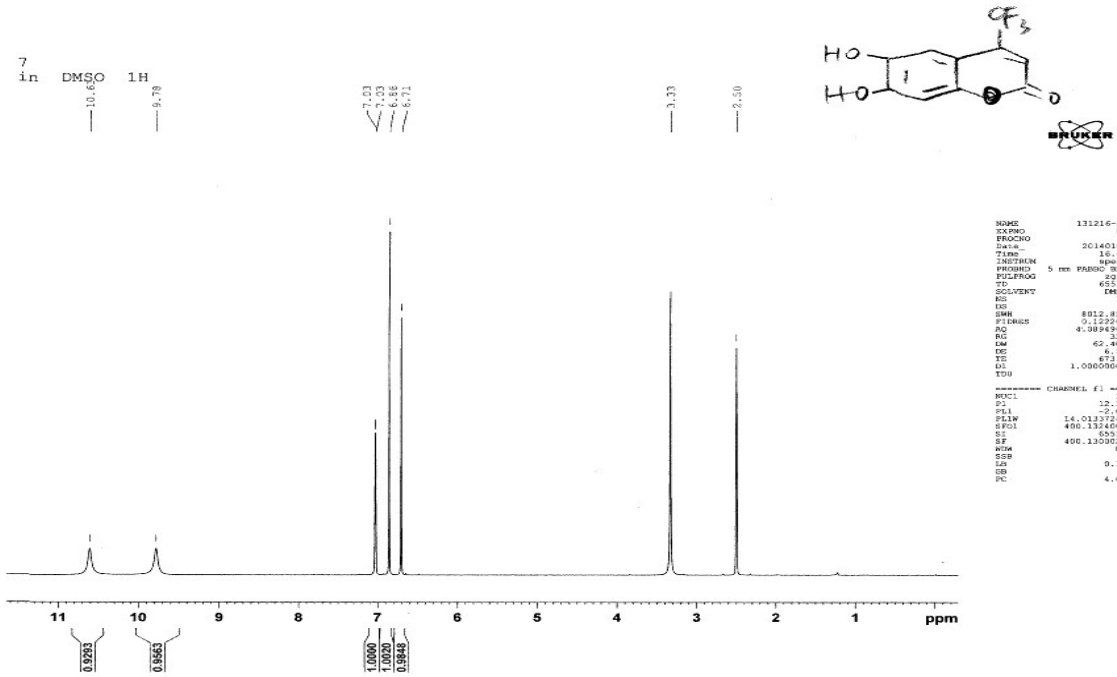

<sup>13</sup>C NMR (100 MHz, DMSO-d<sub>6</sub>)

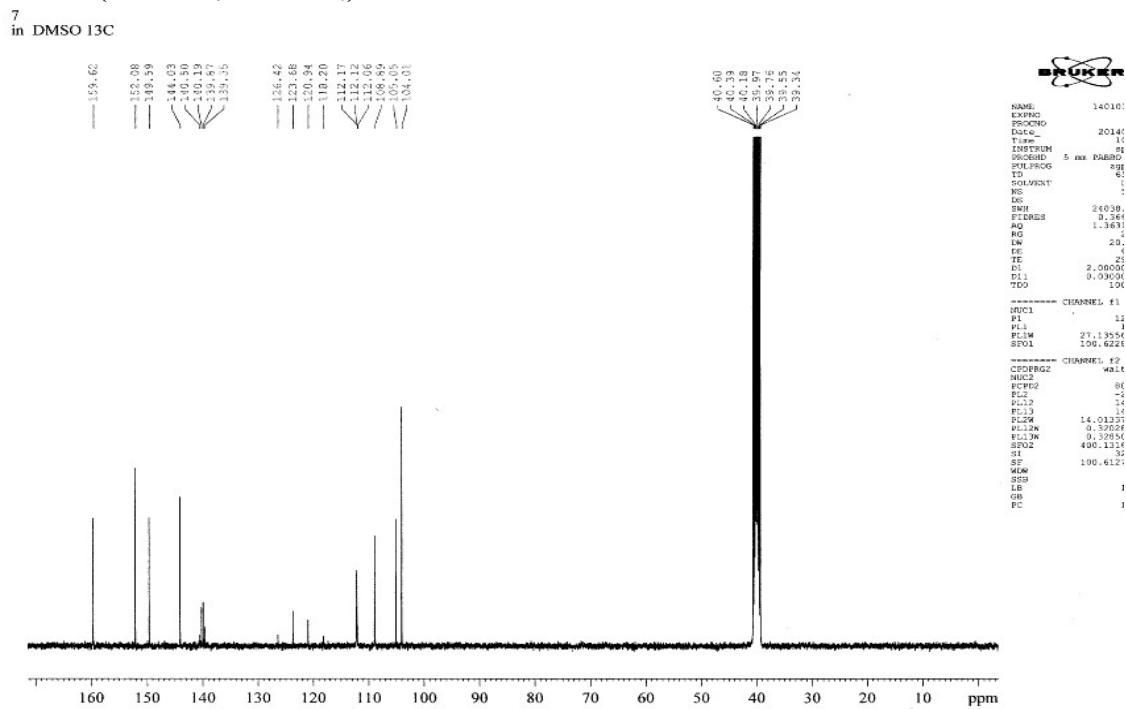

5. <sup>1</sup>H NMR Spectra for compound 5

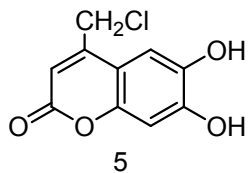

<sup>1</sup>H NMR (400 MHz, DMSO-d<sub>6</sub>)

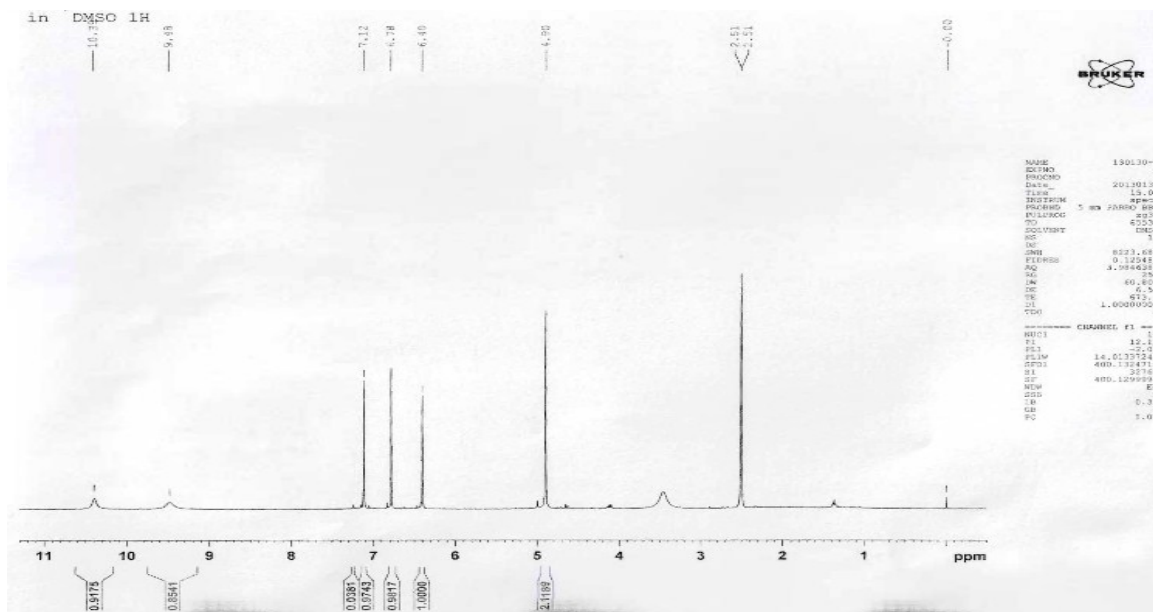

6. <sup>1</sup>H NMR spectra for compound 6

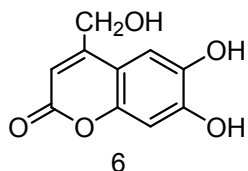

<sup>1</sup>H NMR (400 MHz, DMSO-d<sub>6</sub>)

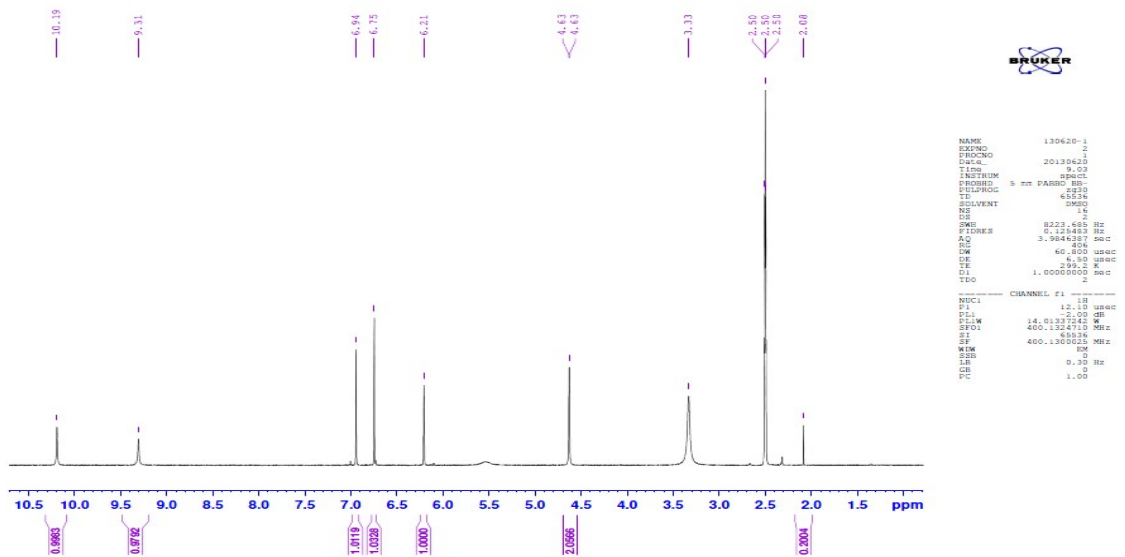

7.  $^1\text{H}$  NMR,  $^{13}\text{C}$  NMR, HSQC, HMBC and HRMS spectra for compound 8

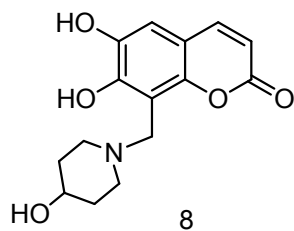

$^1\text{H}$  NMR (400 MHz,  $\text{DMSO}-d_6$ )

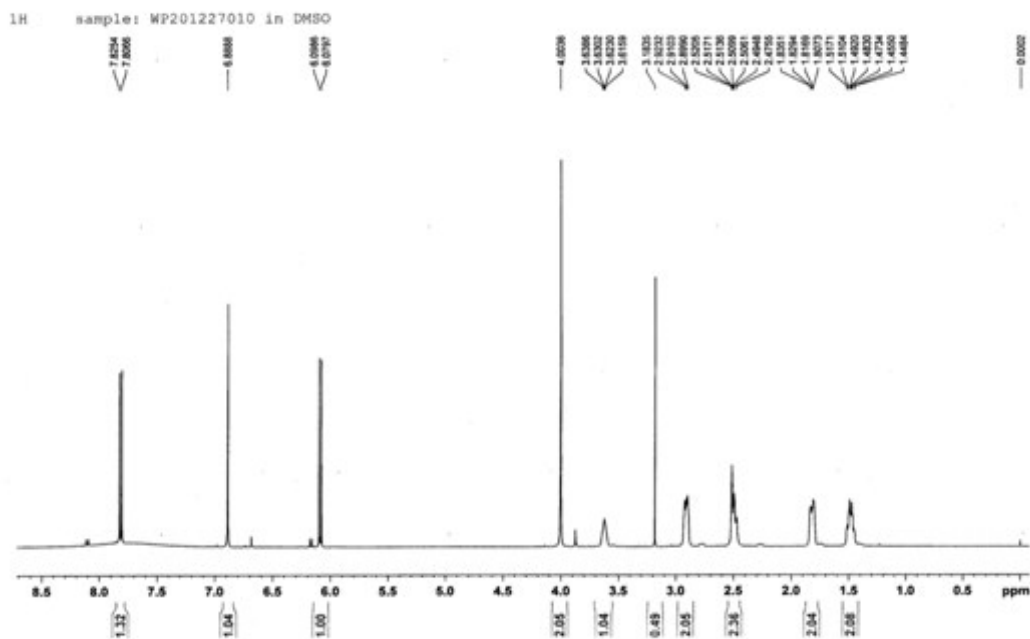

$^{13}\text{C}$  NMR (100 MHz,  $\text{DMSO}-d_6$ )

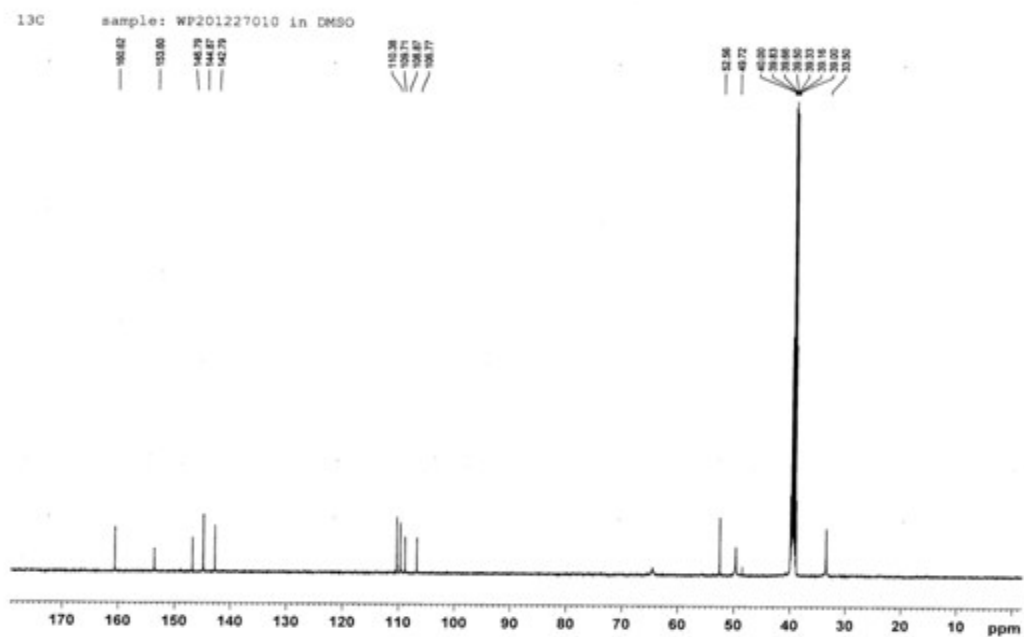

### HSQC

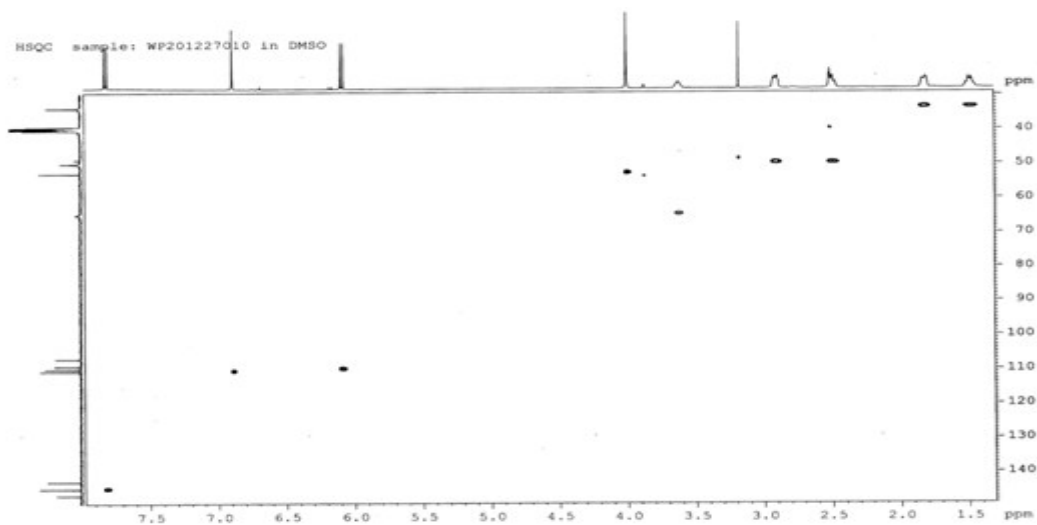

### HMBC

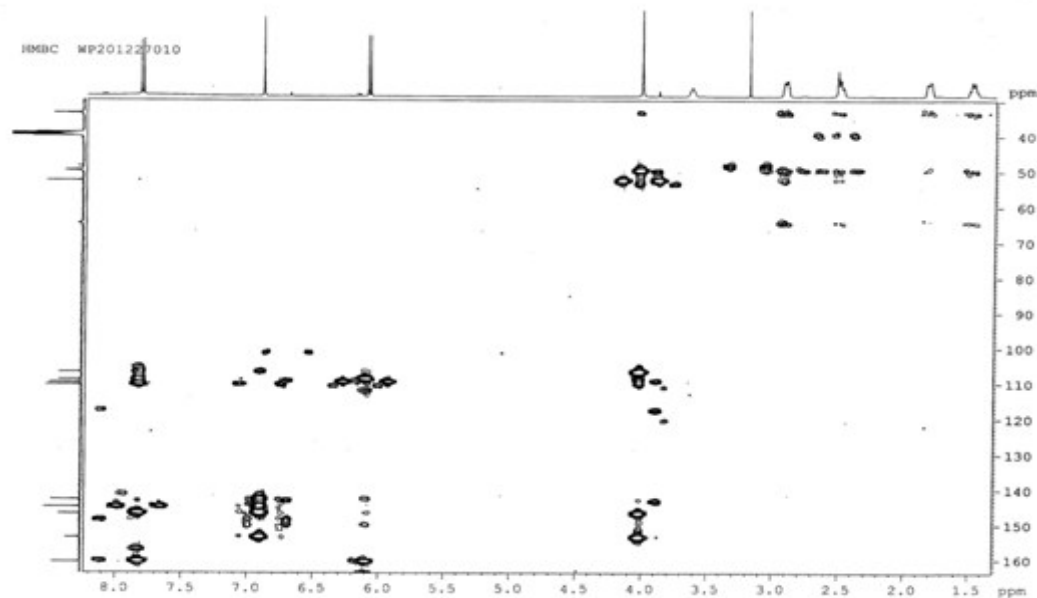

### HRMS (ESI)

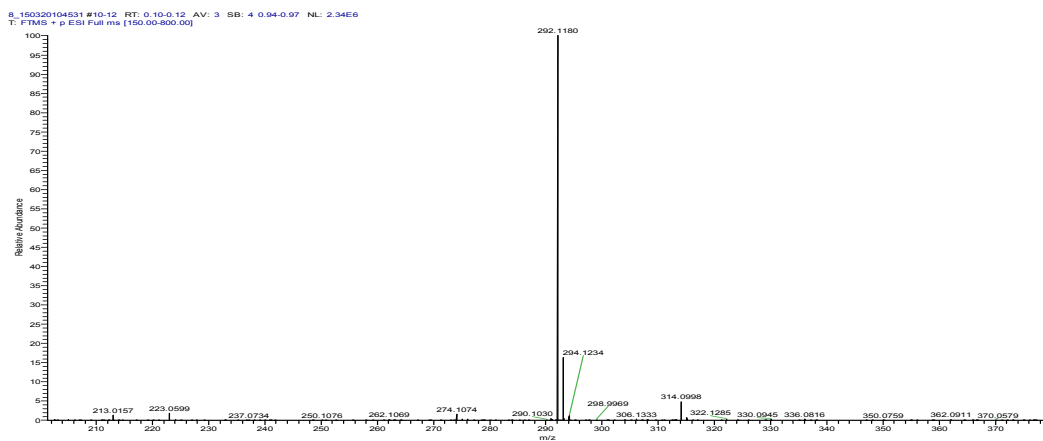

8.  $^1\text{H}$  NMR,  $^{13}\text{C}$  NMR, HSQC, HMBC and HRMS spectra for compound 9

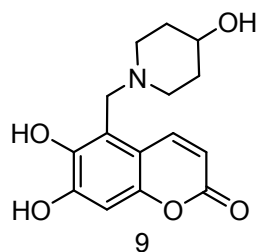

$^1\text{H}$  NMR (400 MHz,  $\text{DMSO-}d_6$ )

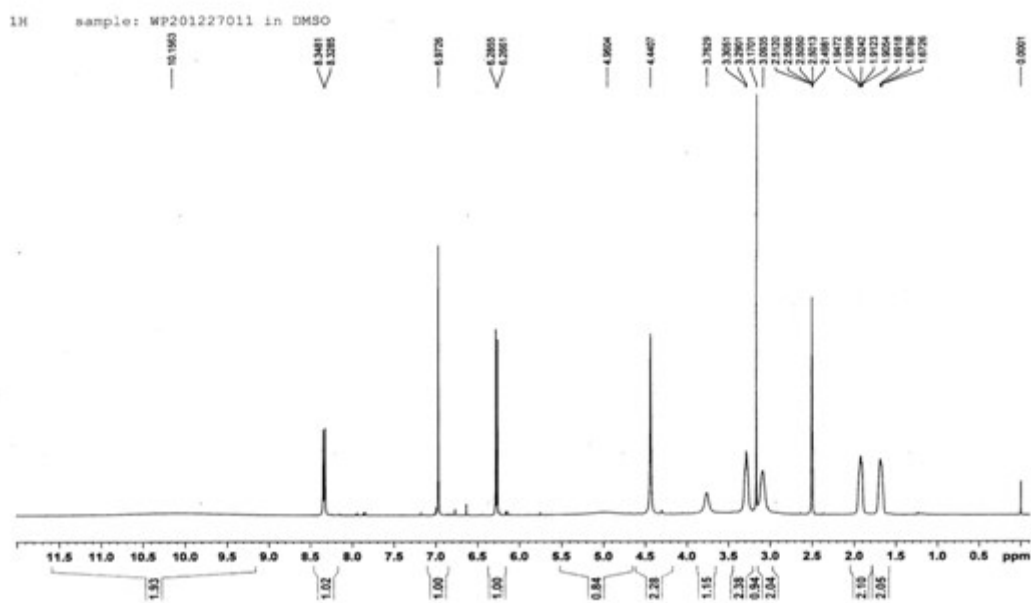

$^{13}\text{C}$  NMR (100 MHz,  $\text{DMSO-}d_6$ )

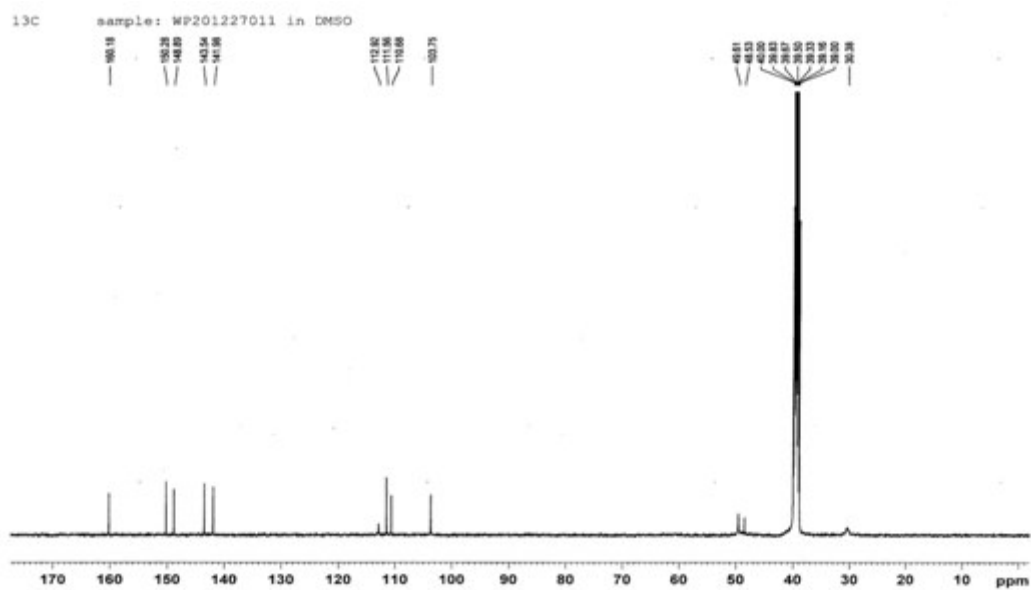



### HSQC

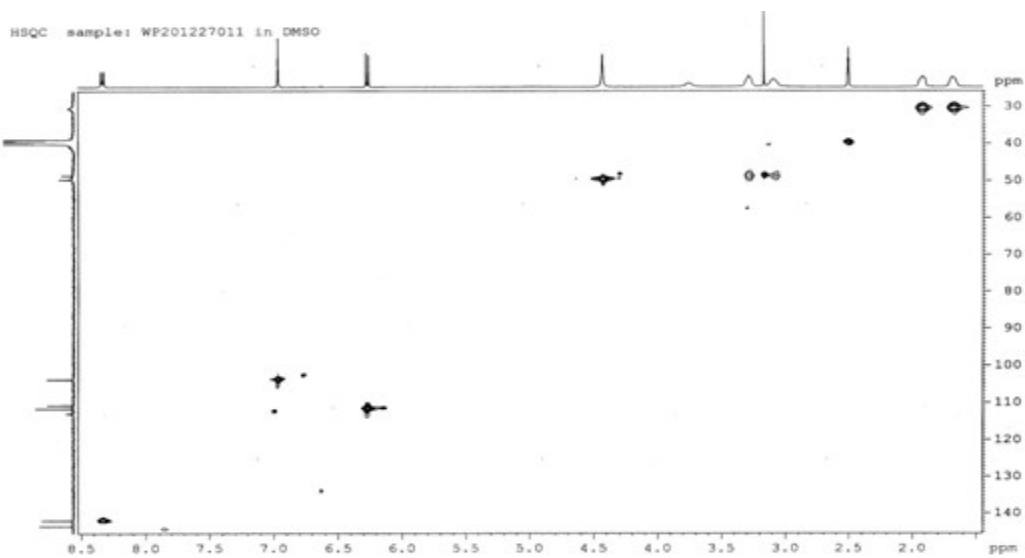

### HMBC

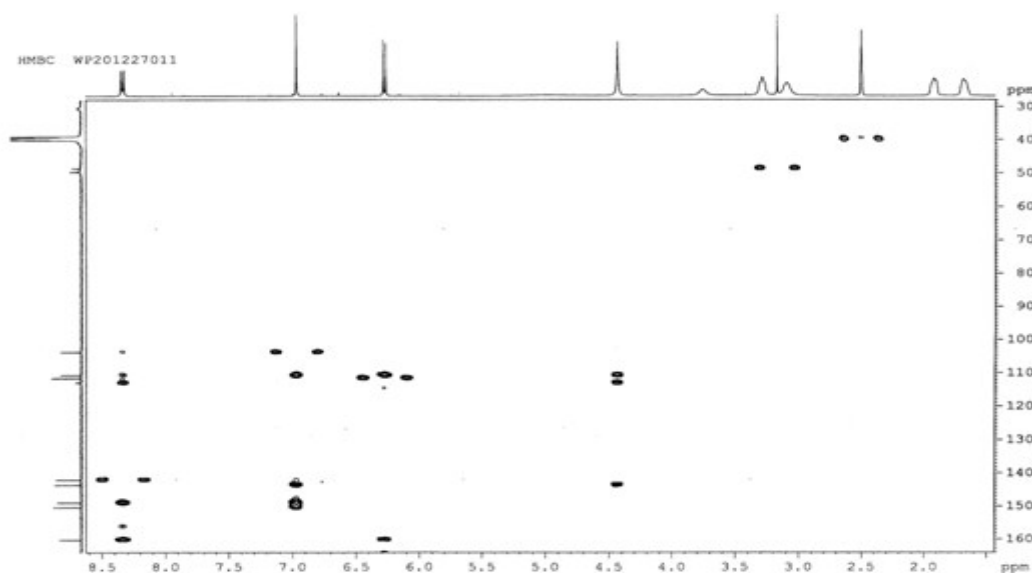

### HRMS (ESI)

9 #10.11 RT: 0.10-0.11 AV: 2 SB: 3 0.093-0.06 NL: 5.82E6  
T: FTMS - p ESI Full.ms [150.00-500.00]

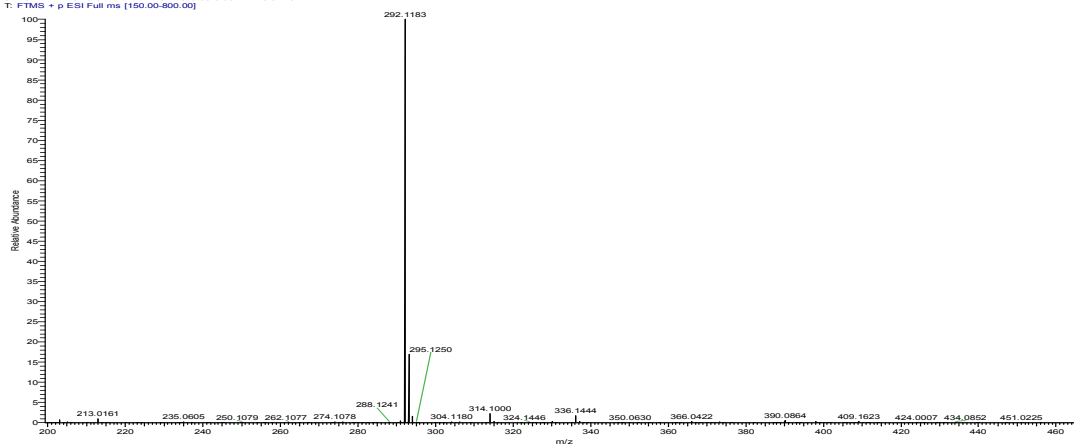

9. <sup>1</sup>H NMR, <sup>13</sup>C NMR and HRMS spectra for compound 10

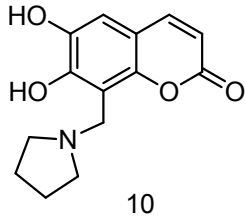

<sup>1</sup>H NMR (400 MHz, DMSO-d<sub>6</sub>)

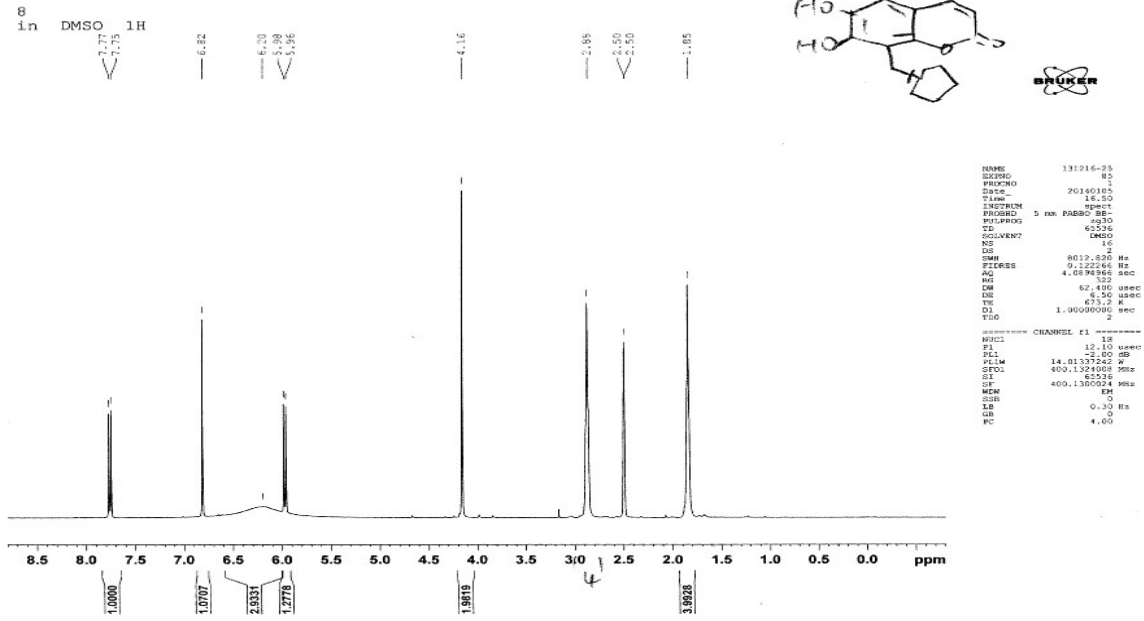

<sup>13</sup>C NMR (100 MHz, DMSO-d<sub>6</sub>)

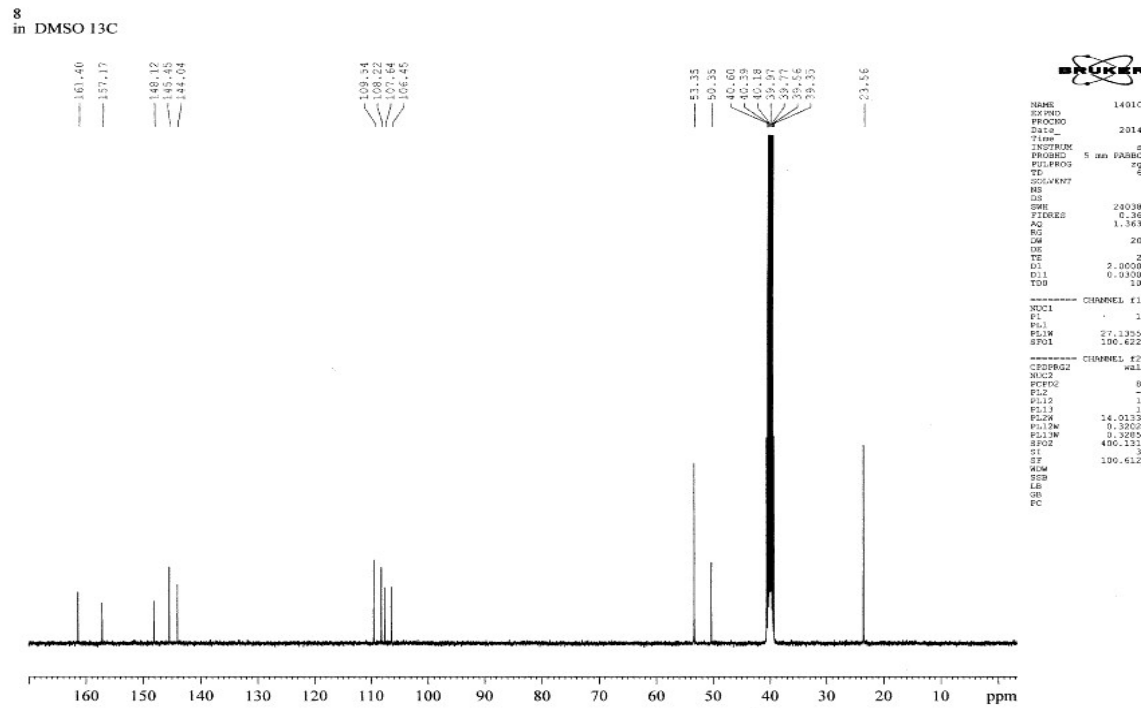

## HRMS (ESI)

10 #10-12 RT: 0.10-0.12 AV: 3 SB: 3 0.94-0.96 NL: 3.05E6  
T: FTMS + p ESI Full ms [150.00-800.00]

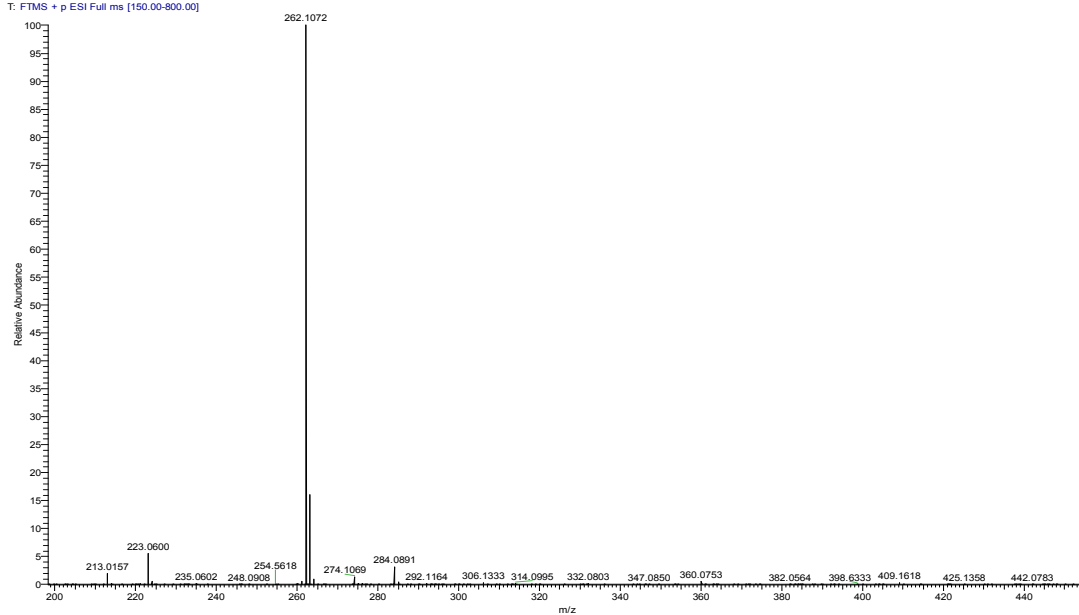

## 10. <sup>1</sup>H NMR spectra for compound 11

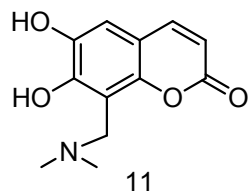

## <sup>1</sup>H NMR (400 MHz, DMSO-d<sub>6</sub>)

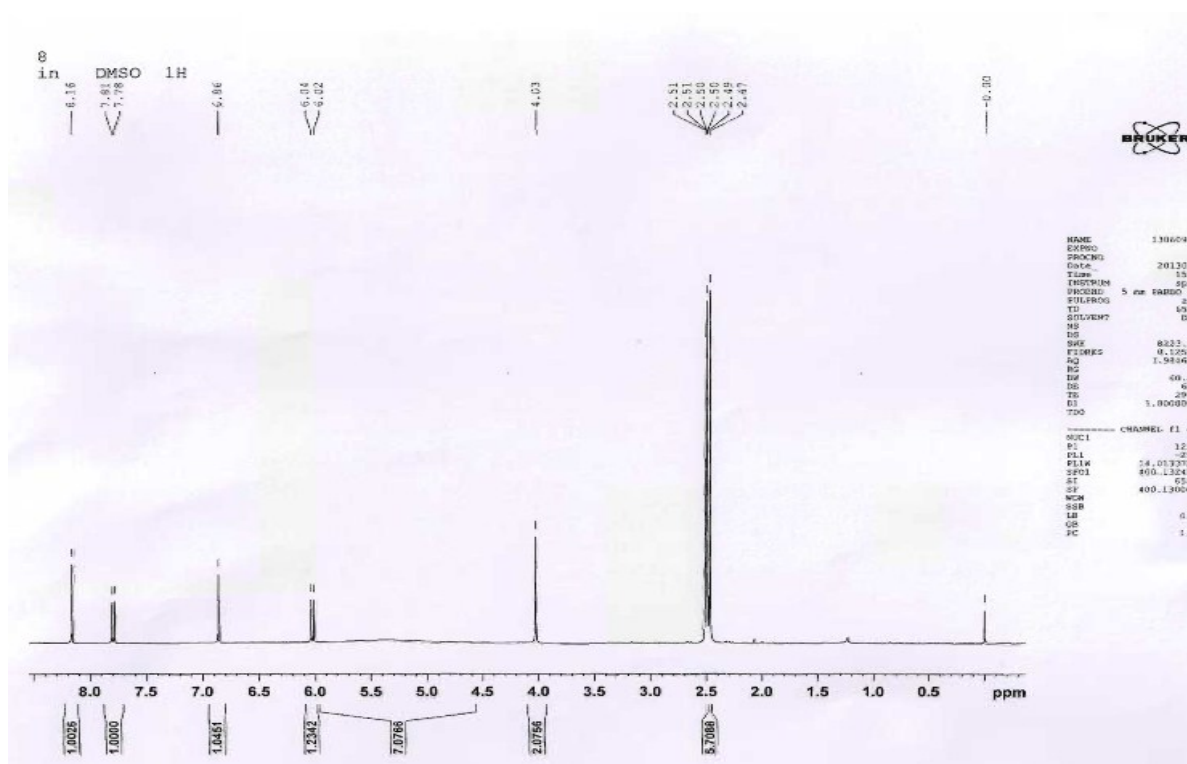

11. <sup>1</sup>H NMR, <sup>13</sup>C NMR and HRMS spectra for compound 12

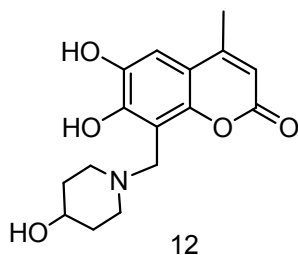

<sup>1</sup>H NMR (400 MHz, DMSO-d<sub>6</sub>)

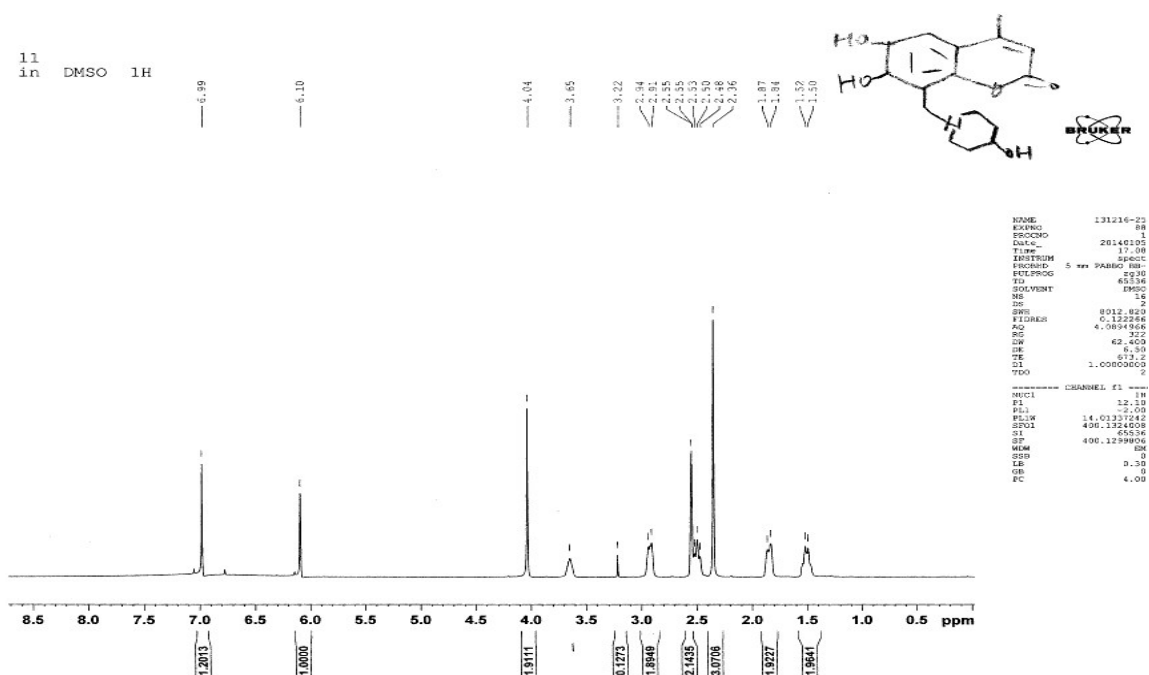

<sup>13</sup>C NMR (100 MHz, DMSO-d<sub>6</sub>)

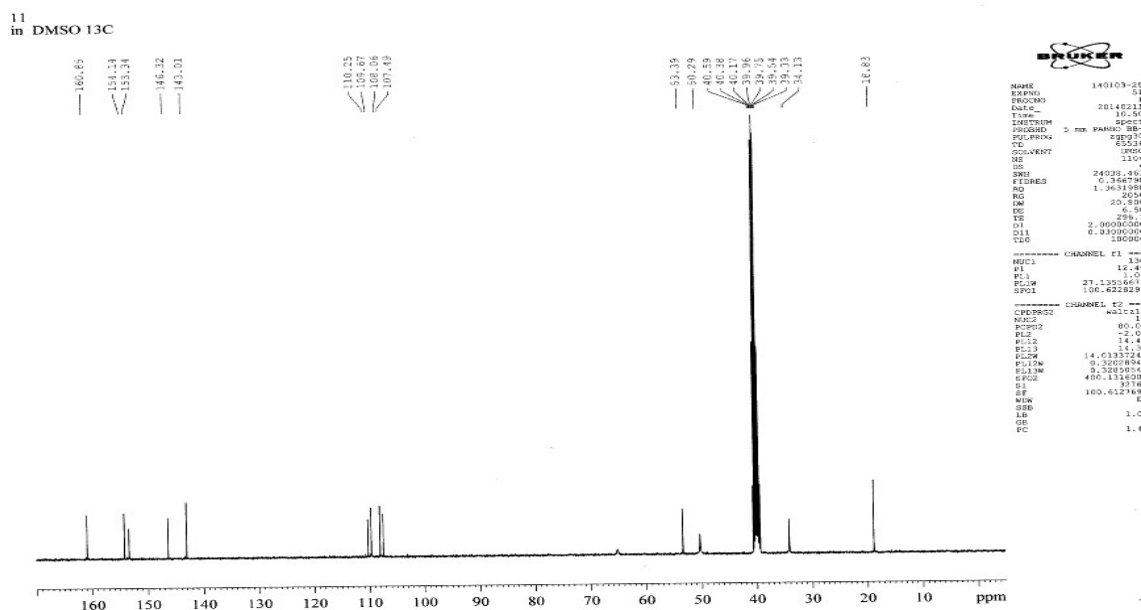

# HRMS (ESI)

12 #10-13 RT: 0.10-0.13 AV: 4 SB: 2 0.97-0.99 NL: 4.29E6  
T: FTMS + p ESI Full ms [150.00-800.00]

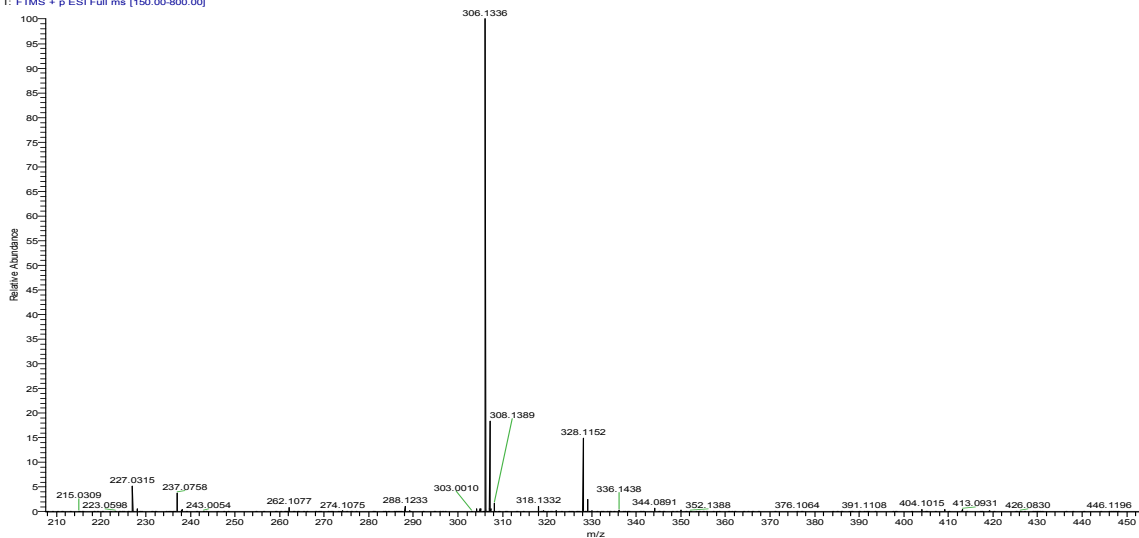

## 12. <sup>1</sup>H NMR, <sup>13</sup>C NMR and HRMS spectra for compound 13

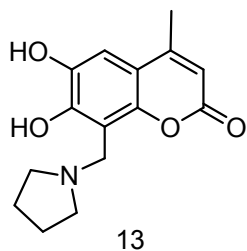

### <sup>1</sup>H NMR (400 MHz, DMSO-*d*<sub>6</sub>)

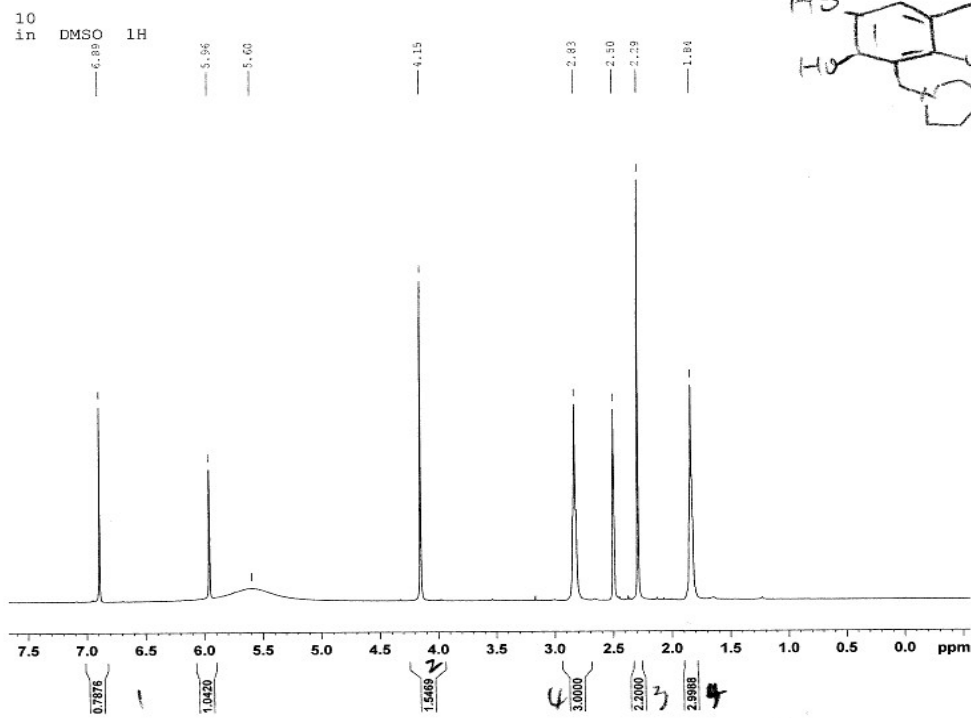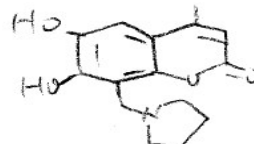

BRUKER

```

NAME          151216-25
EXPNO         81
PROCNO        1
DATE_         20140105
Time          16.56
INSTRUM       spect
PROBHD        5 mm PABBO BBO-
PULPROG       zgpg30
TD            65536
SOLVENT       DMSO
NS            16
DS            4
SWH           8012.8201
FIDRES        0.1223661
AQ            4.2884562
RG            322
SM           62.4001
DE           0.501
TE           303.2
D1           1.00000000
TSD          2

===== CHANNEL f1 =====
NUC1          1H
P1            12.10
PC1           -2.00
PL1          14.0137742
PR1          400.1324008
SI           65536
SF           400.1360020
WDW           EM
SSB           0
LB           0.30
GB           0
PC           4.00
    
```

# <sup>13</sup>C NMR (100 MHz, DMSO-d<sub>6</sub>)

10  
in DMSO 13C

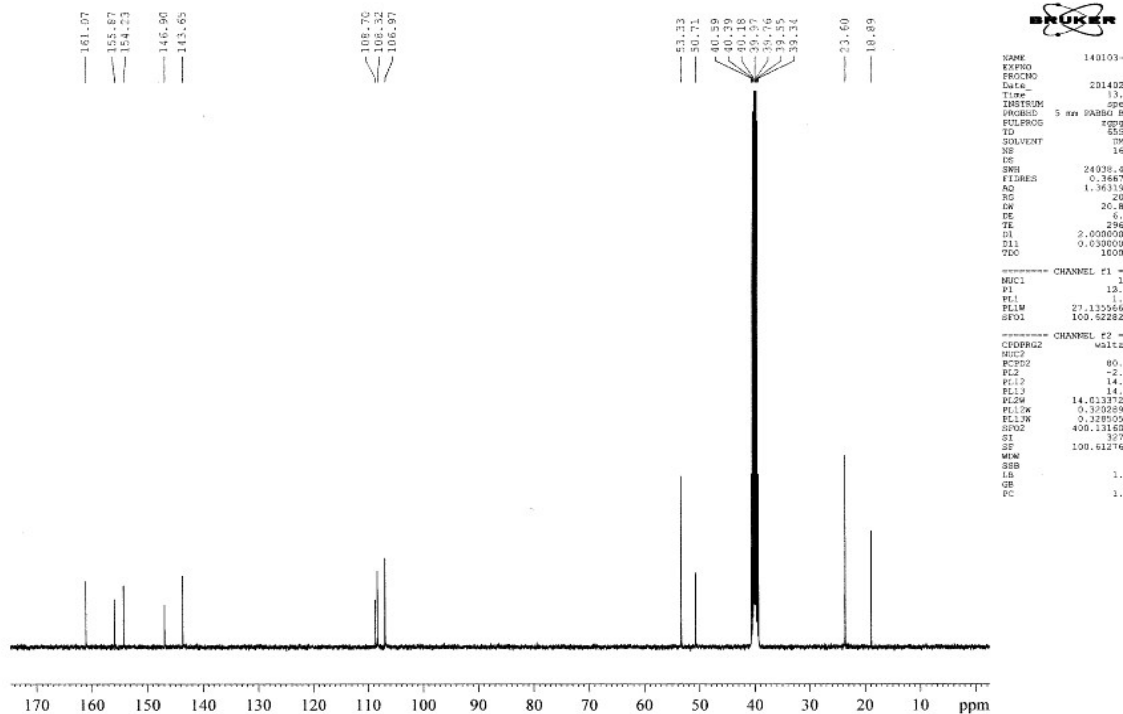

## HRMS (ESI)

13 #10-12 RT: 0.10-0.12 AV: 3 SB: 4 0.92-0.96 NL: 3.60E6  
 T: FTMS + p ESI Full ms [150.00-800.00]

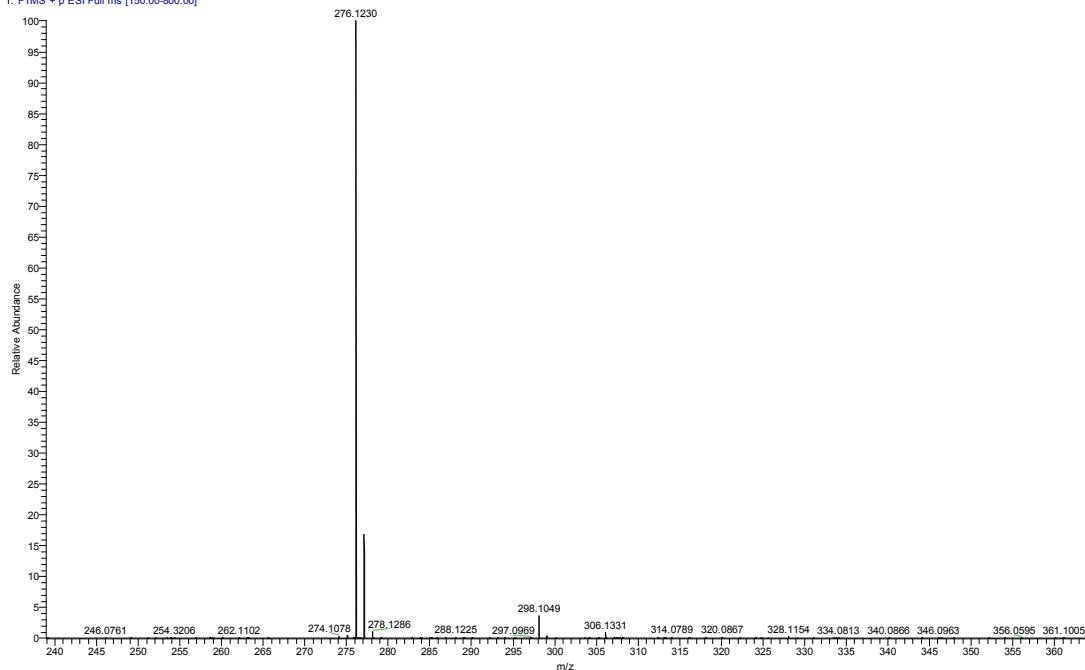

13. <sup>1</sup>H NMR, <sup>13</sup>C NMR and HRMS spectra for compound 14

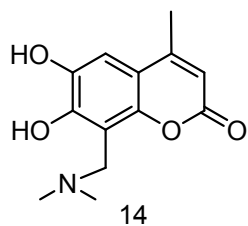

<sup>1</sup>H NMR (400 MHz, DMSO-d<sub>6</sub>)

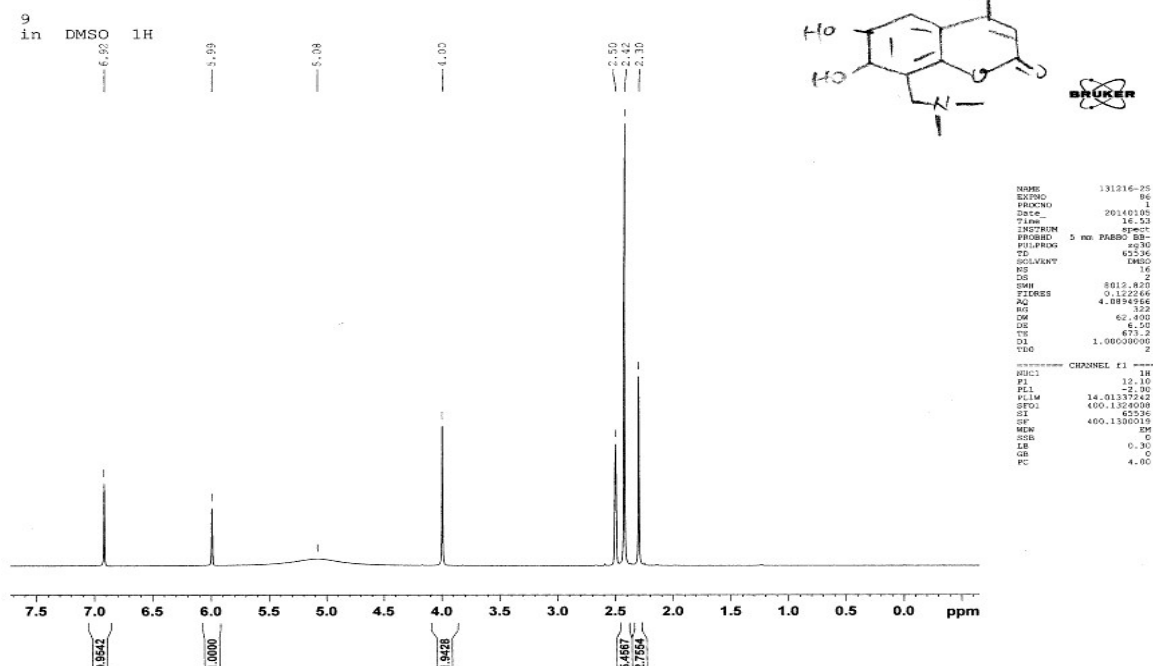

<sup>13</sup>C NMR (100 MHz, DMSO-d<sub>6</sub>)

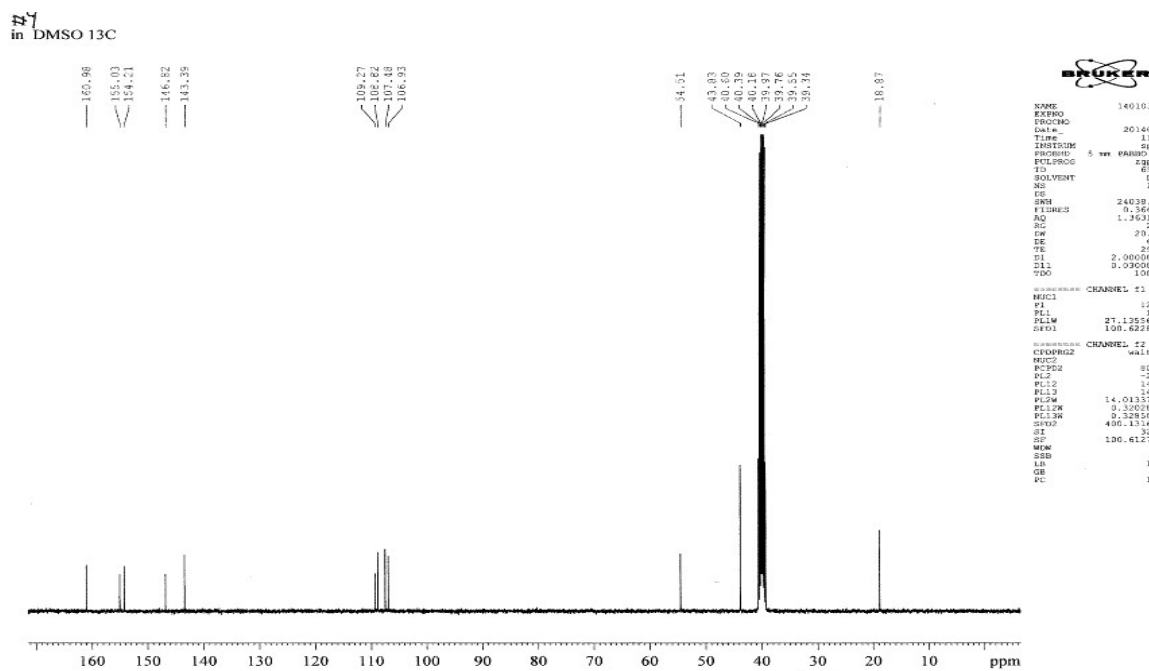

# HRMS (ESI)

14 #10-12 RT: 0.10-0.12 AV: 3 SB: 3 0.95-0.97 NL: 1.50E6  
T: FTMS + p ESI Full ms [150.00-800.00]

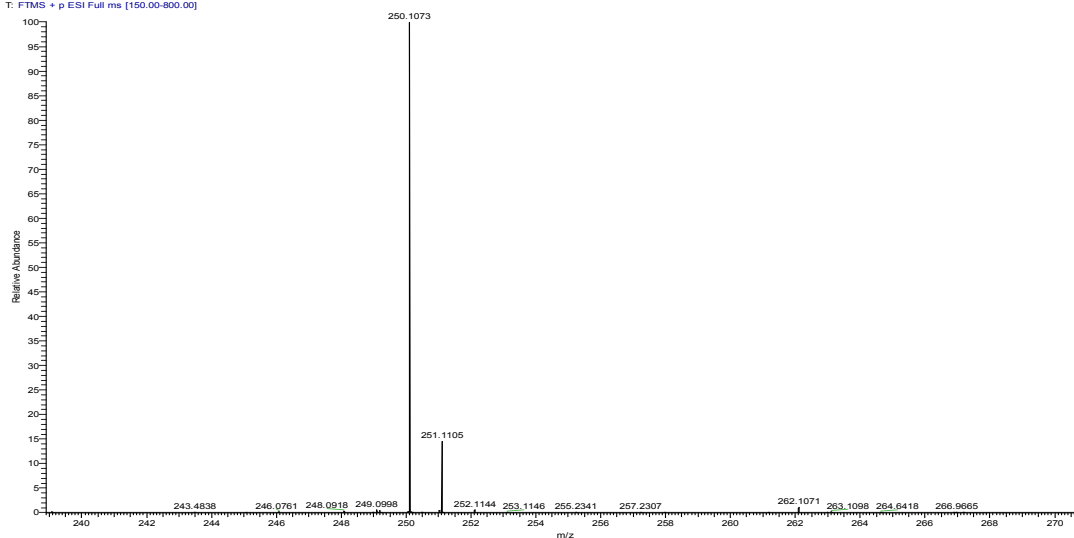

## 14. <sup>1</sup>H NMR, <sup>13</sup>C NMR and HRMS spectra for compound 15

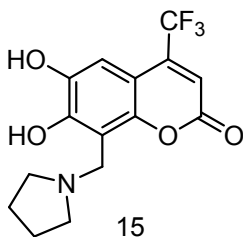

<sup>1</sup>H NMR (400 MHz, DMSO-d<sub>6</sub>)

12  
in DMSO 1H  
6.71  
6.70  
6.15

4.29

3.18  
3.17  
3.15

2.50

1.84  
1.82  
1.80

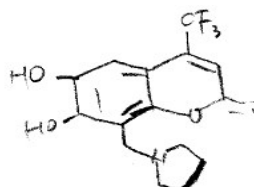

BRUKER

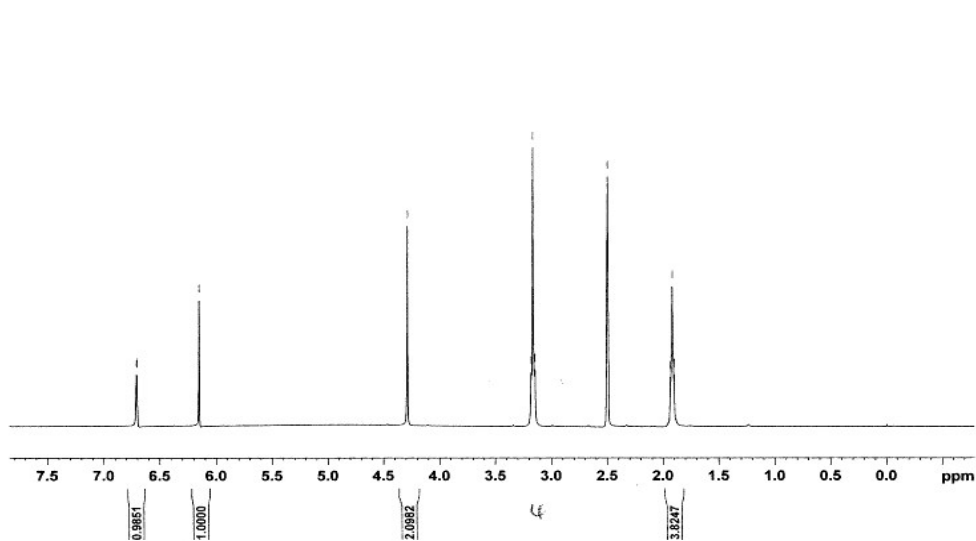

```

NAME          131216-25
EXPER         89
PROCNO        1
DATE          20140103
TIME          17.04
INSTRUM       spect
PROBHD        5 mm PABBO BB-
PULPROG       zgpg30
TD            65536
SOLVENT       DMSO
NS            16
DS            2
AQ            8012.820
FIDRES        0.122266
AQ           4.084866
RG            322
DE            62.420
TE            8.50
PI            671.2
D1            1.09000000
D10           2
----- CHANNEL f1 -----
NUC1          1H
P1            12.10
PC1           71.00
PL1W         14.01337242
SFO1         400.1324008
SI            65536
SF           400.1300022
XDA          EM
SQR           0
LB            0.30
GB            0
PC            4.00
    
```



# <sup>13</sup>C NMR (100 MHz, DMSO-d<sub>6</sub>)

12  
in DMSO 13C

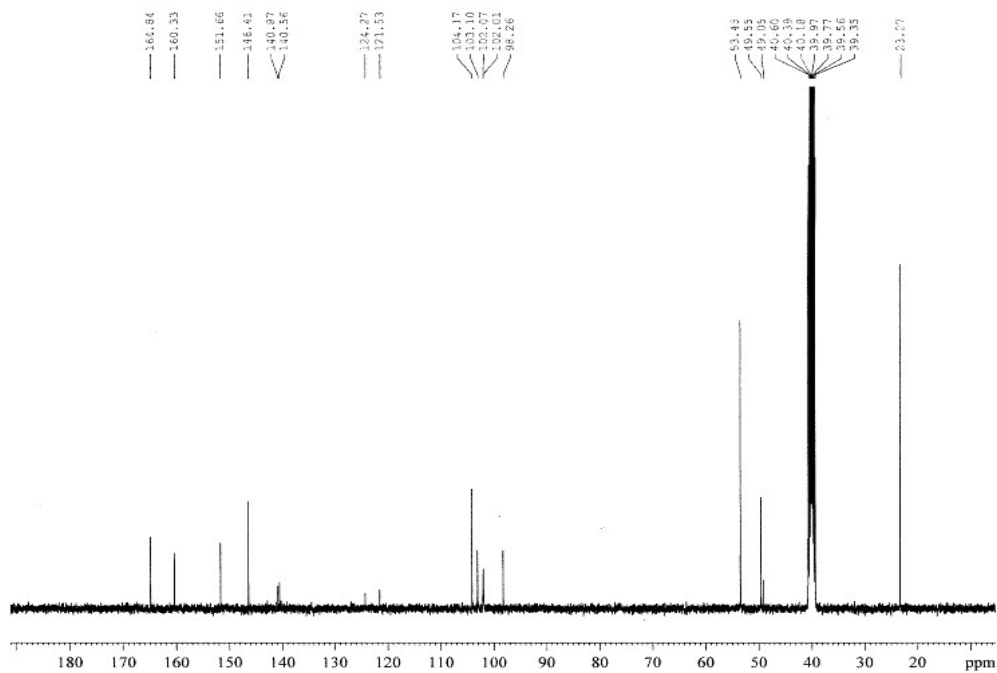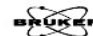

```

NAME          140103-
EXPNO         201402
PROCNO        14.
PROCRES       14.
INSTRUM       SDR
PROBHD        5 mm PABBO B
PULPROG       zgpg
TD             655
SOLVENT       DMSO
NS            27
DS            2
SFO1          24038.4
FIDRES        0.2667
AQ            1.38319
RG            20
DM            20.8
DE            6.
TE            296
D1            2.060800
D11           0.030900
TD0           300

----- CHANNEL f1 -----
NUC1           13
P1             12.
PC1           27.135466
SFO1          100.62282

----- CHANNEL f2 -----
CHRG2         waitz
NUC2           13
PC2           12.
P12           27.135466
SFO2          100.62282

=====
SFR           100.61276
SFR           1.
GB            1.
PC            1.
    
```

# HRMS (ESI)

15 #10-12 RT: 0.10-0.12 AV: 3 SB: 3 0.95-0.97 NL: 7.52E4  
T: FTMS + p ESI Full ms [150.00-800.00]

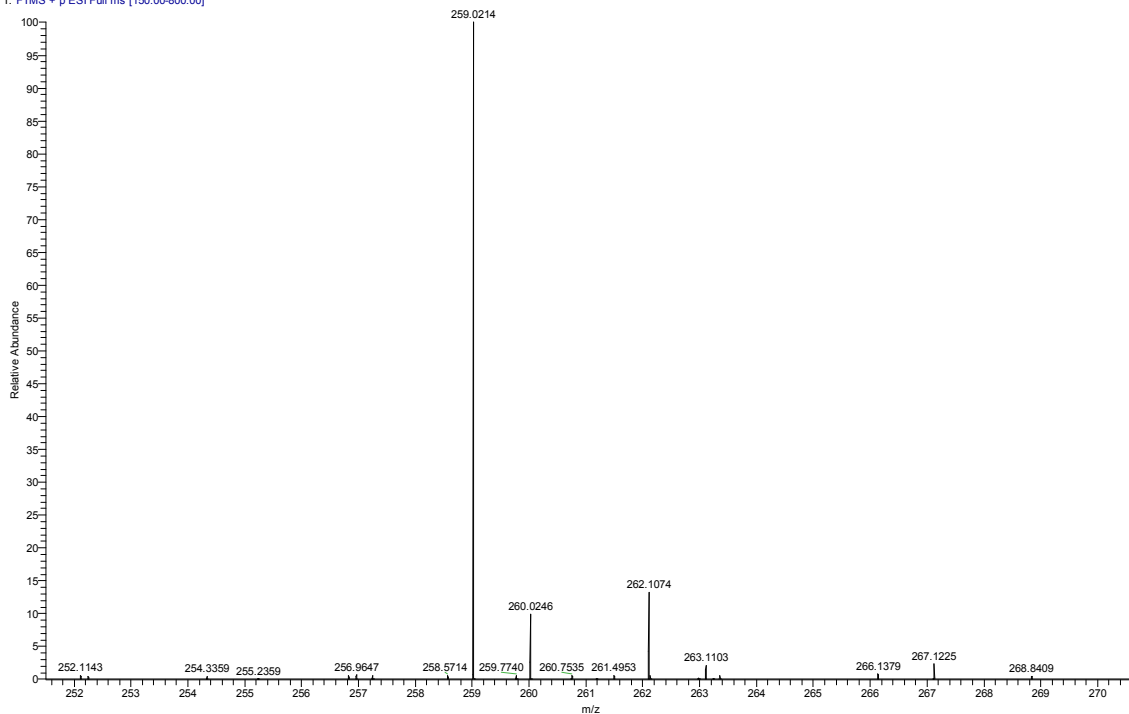

Supplement: c5ra06070b1.pdf [file c5ra06070b1.pdf]
